# Supplementary material for: Heterocycle-derived organosilatranes as naked eye sensors for Sn2+ ions and their potential inhibiting activity against HIV-1 protease via a computational approach
Source: Royal Society of Chemistry journal article supplement (doi:10.1039/d3nj01484c), 2023-01-01
Supplement: d3nj01484c1.pdf [file d3nj01484c1.pdf]

## Heterocycle derived Organosilatrane as Naked eye sensor for Sn<sup>2+</sup> ions and its potential inhibiting activity against HIV-1 protease via computational approach

Gurjaspreet Singh<sup>a\*</sup>, Diksha<sup>a\*</sup>, Mohit<sup>a</sup>, Priyanka<sup>b</sup>, Anita Devi<sup>a</sup>, Swati Devi<sup>a</sup>, Harshbir Kaur<sup>a</sup>,  
Jandeep Singh<sup>c</sup> and Gurleen Singh<sup>c</sup>

<sup>a</sup>Department of Chemistry, Panjab University, Chandigarh, 160014, India

<sup>b</sup>Department of Humanities and Applied Sciences, Echelon Institute of Technology  
Faridabad, Haryana, 121101, India

<sup>c</sup>Department of Chemistry, Lovely Professional University, Phagwara, Punjab, India

\*Corresponding Authors

Prof. Gurjaspreet Singh

Department of Chemistry & Centre of Advanced Studies

Panjab University, Chandigarh, India

Email: [gjsingh@pu.ac.in](mailto:gjsingh@pu.ac.in)

Dr. Diksha

Department of Chemistry & Centre of Advanced Studies

Panjab University, Chandigarh, India

Email: [mehtadiksha49@gmail.com](mailto:mehtadiksha49@gmail.com)

| Entry                                                 | Page No. |
|-------------------------------------------------------|----------|
| <sup>1</sup> H NMR spectrum of compound 4a ( Fig.S1)  | 2        |
| <sup>1</sup> H NMR spectrum of compound 4b ( Fig.S2)  | 2        |
| <sup>1</sup> H NMR spectrum of compound 4c ( Fig.S3)  | 3        |
| <sup>13</sup> C NMR spectrum of compound 4a ( Fig.S4) | 3        |
| <sup>13</sup> C NMR spectrum of compound 4b ( Fig.S5) | 4        |
| <sup>13</sup> C NMR spectrum of compound 4c ( Fig.S6) | 4        |
| Mass spectrum of compound 4a (Fig. S7)                | 5        |
| Mass spectrum of compound 4b (Fig. S8)                | 5        |
| Mass spectrum of compound 4c (Fig. S9)                | 6        |
| IR spectrum of compound 4a (Fig. S10)                 | 6        |
| IR spectrum of compound 4b (Fig. S11)                 | 7        |
| IR spectrum of compound 4c (Fig. S12)                 | 7        |

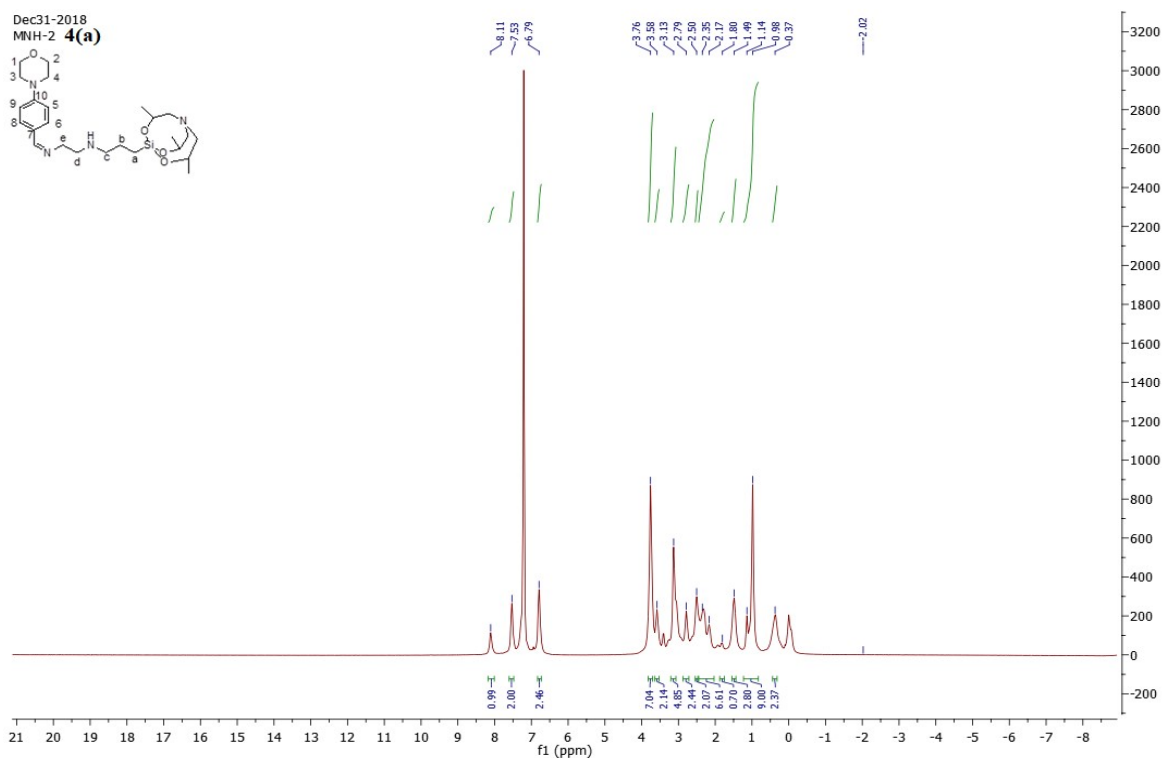

**Fig.S1**  $^1\text{H}$  NMR spectrum of compound 4a

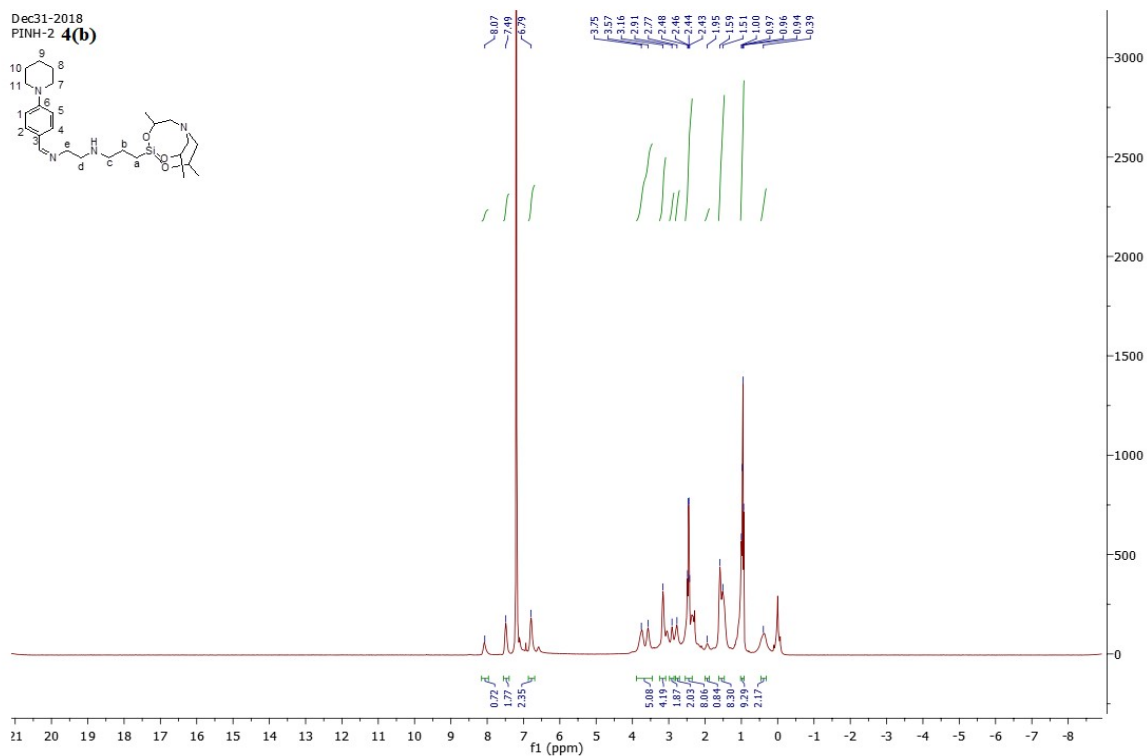

**Fig.S2**  $^1\text{H}$  NMR spectrum of compound 4b

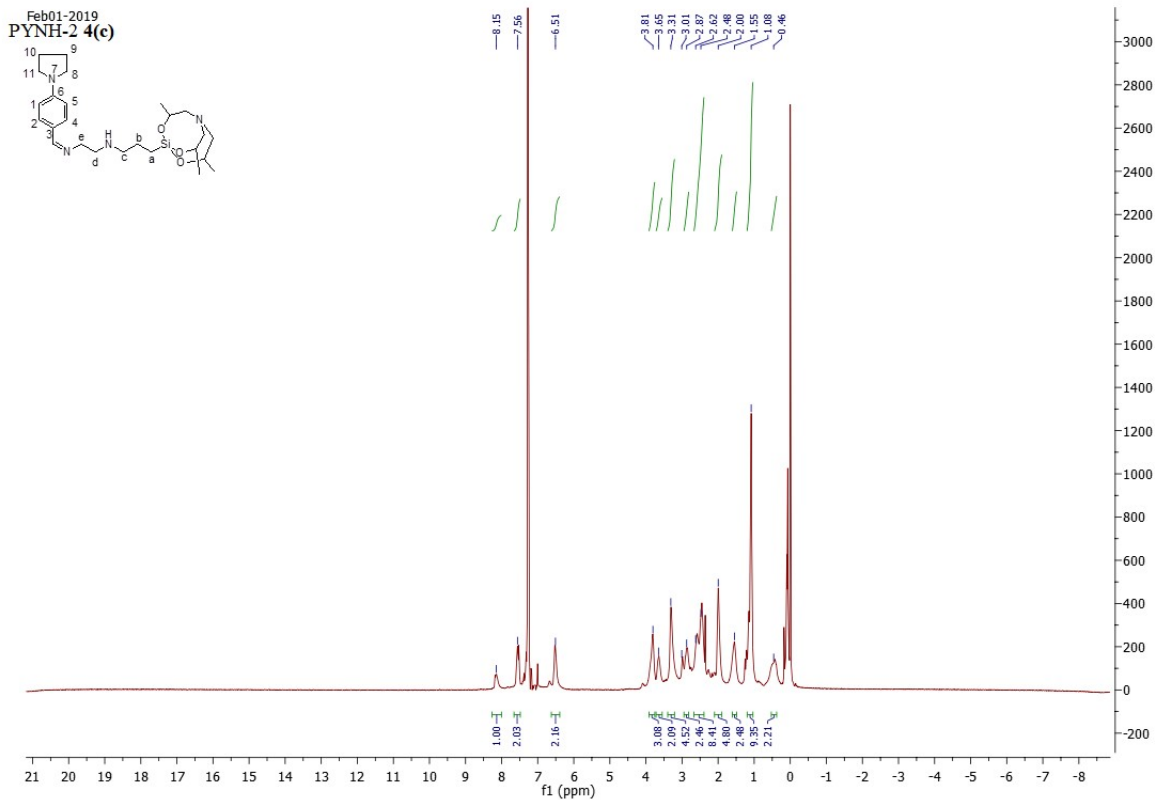

Fig.S3  $^1\text{H}$  NMR spectrum of compound 4c

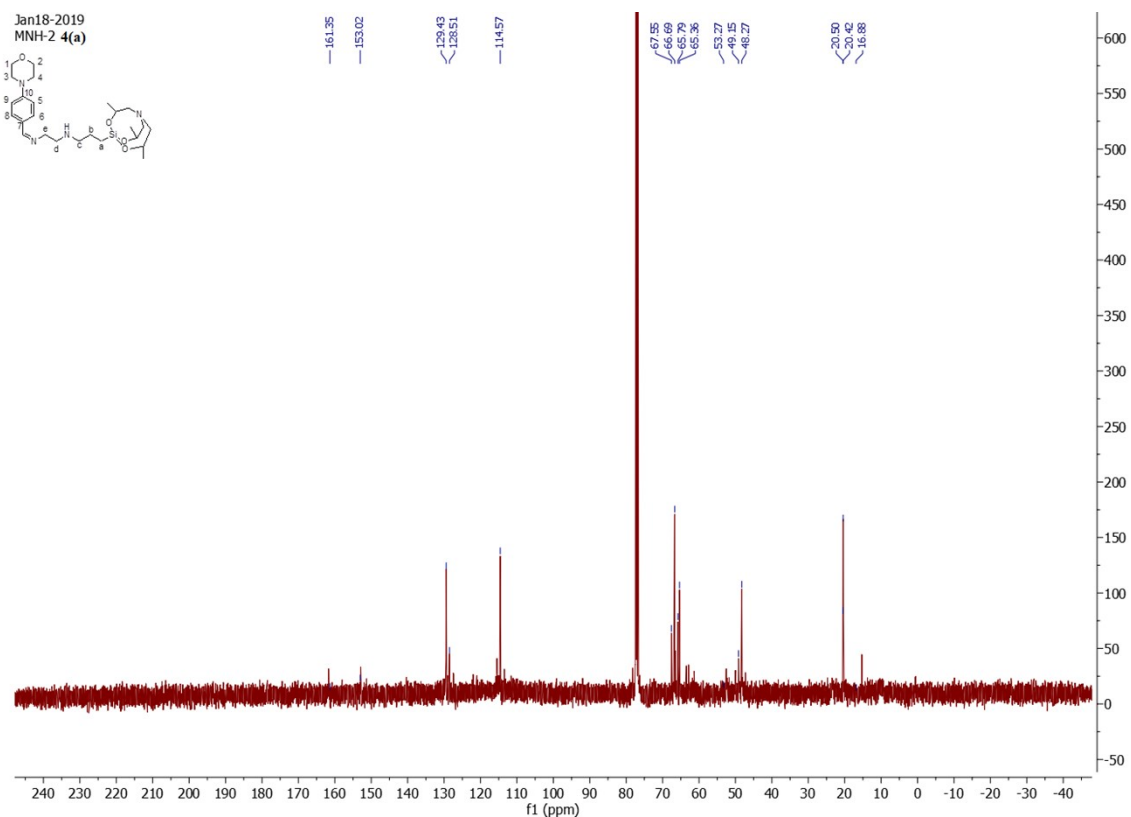

Fig.S4  $^{13}\text{C}$  NMR spectrum of compound 4a

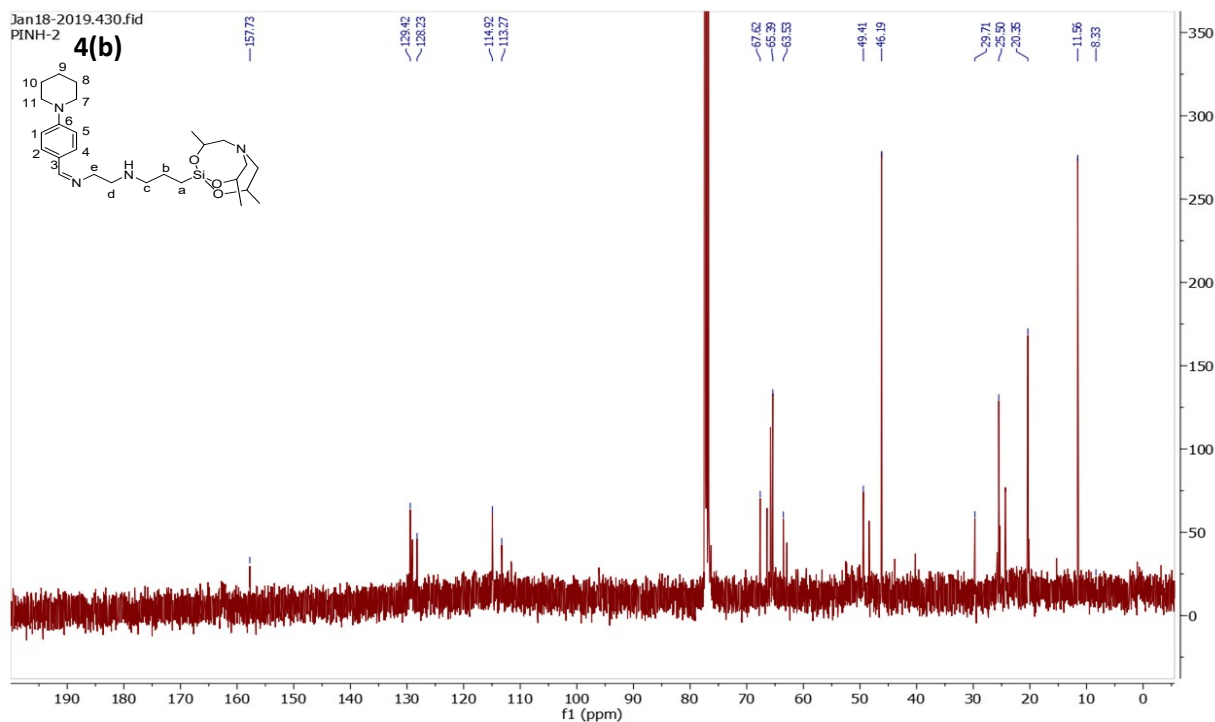

Fig.S5  $^{13}\text{C}$  NMR spectrum of compound **4b**

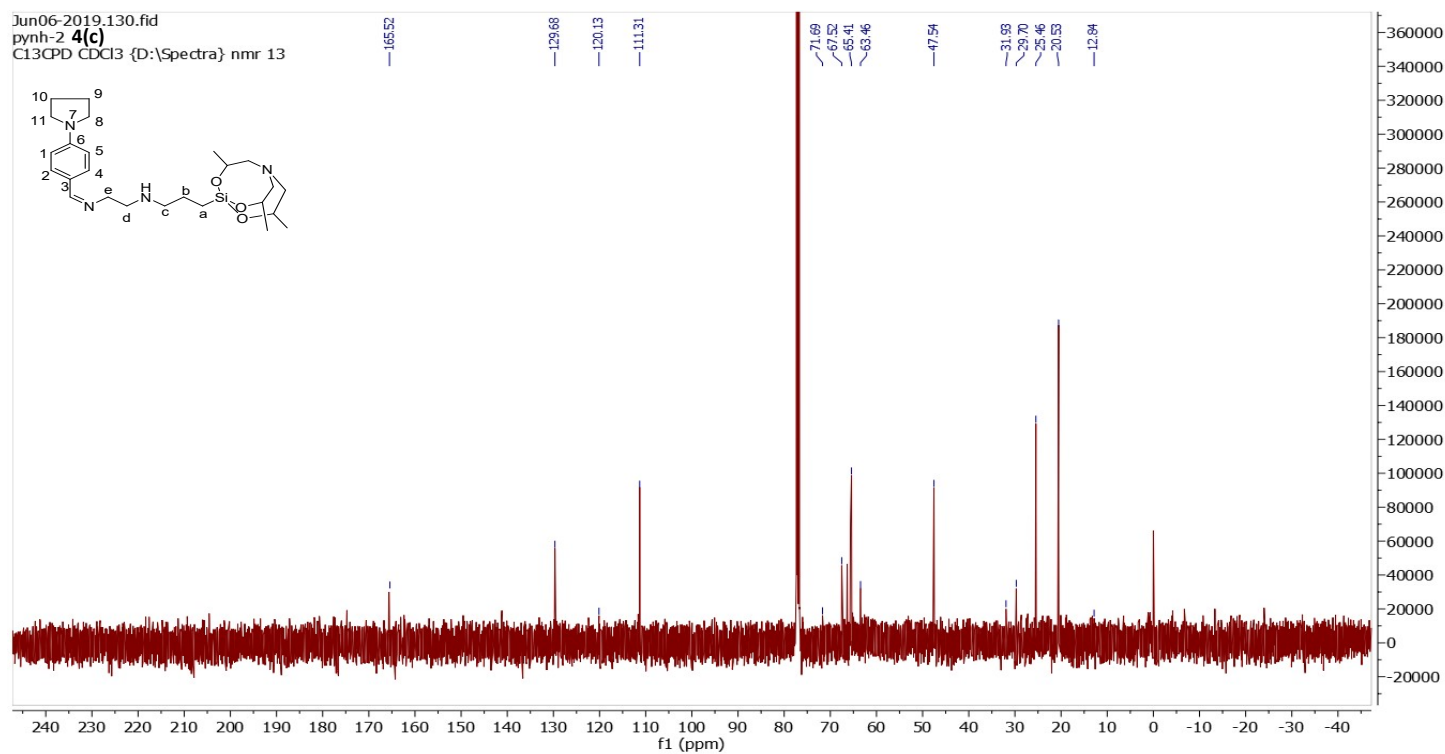

Fig.S6  $^{13}\text{C}$  NMR spectrum of compound **4c**

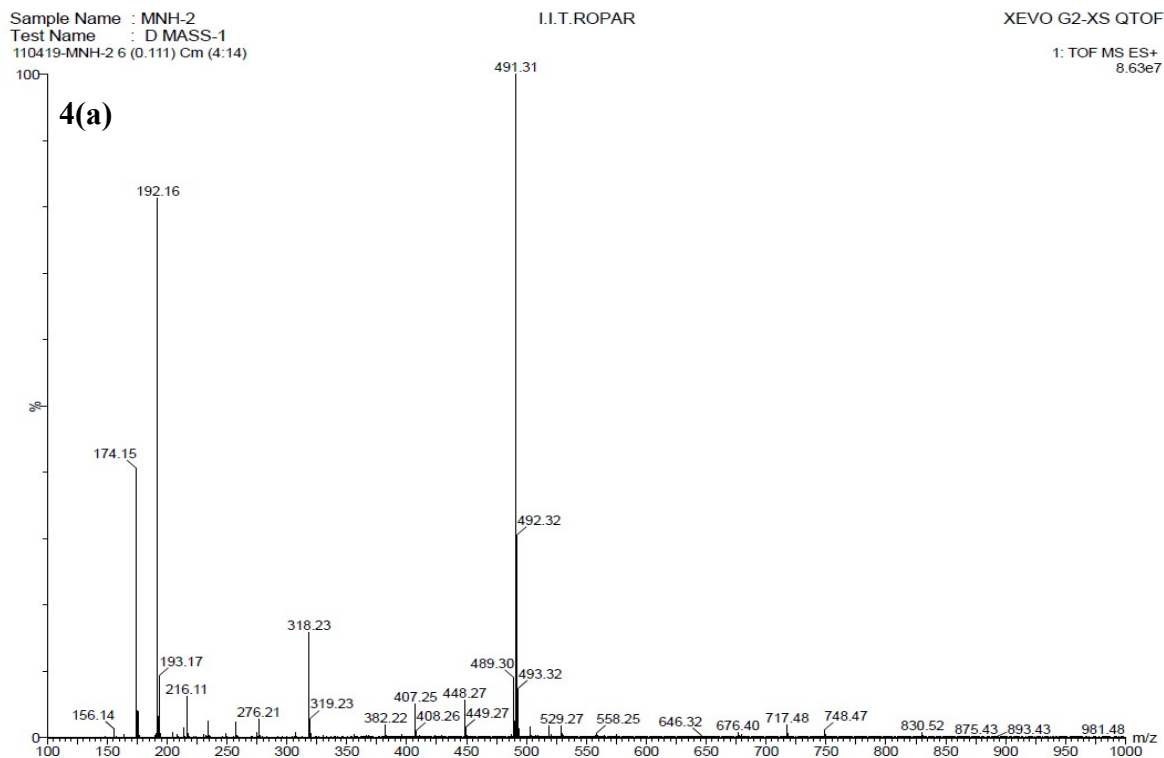

**Fig.S7 Mass spectrum of compound 4a**

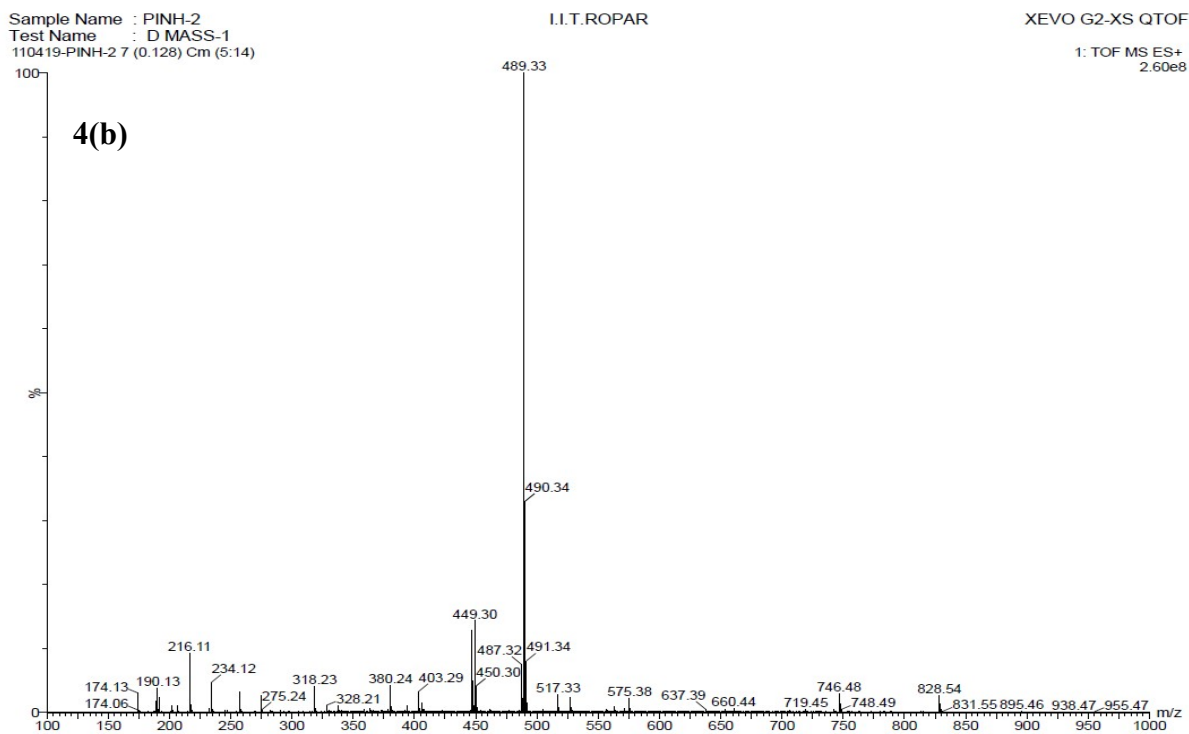

**Fig.S8 Mass spectrum of compound 4b**

Sample Name : PYNH-2  
Test Name : D MASS-1  
110419-PYNH-2 8 (0.145) Cm (8:15)

I.I.T.ROPAR

XEVO G2-XS QTOF

1: TOF MS ES+  
7.91e7

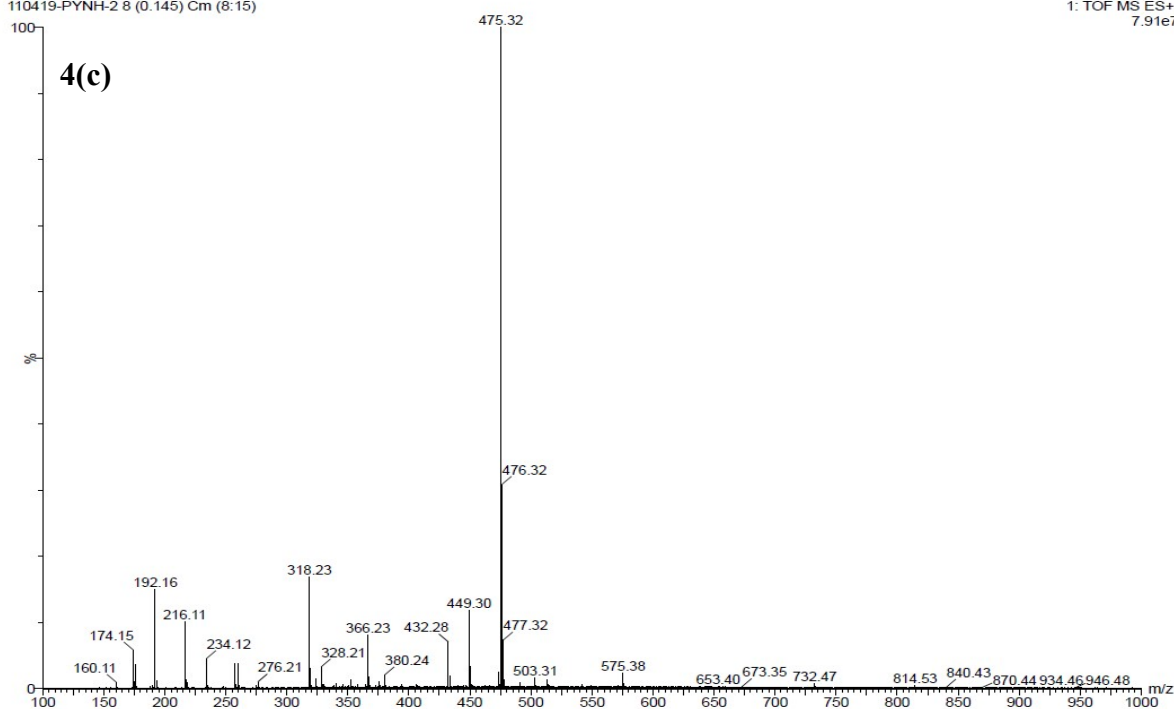

**Fig.S9** Mass spectrum of compound 4c

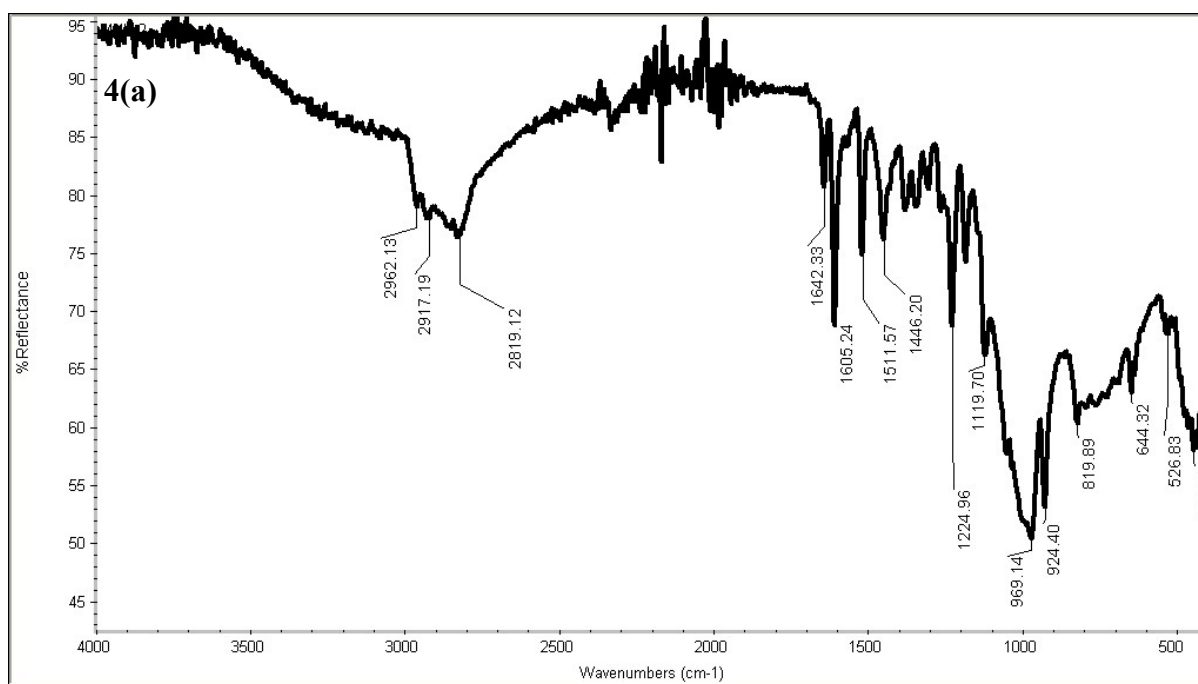

**Fig.S10** IR spectrum of compound 4a

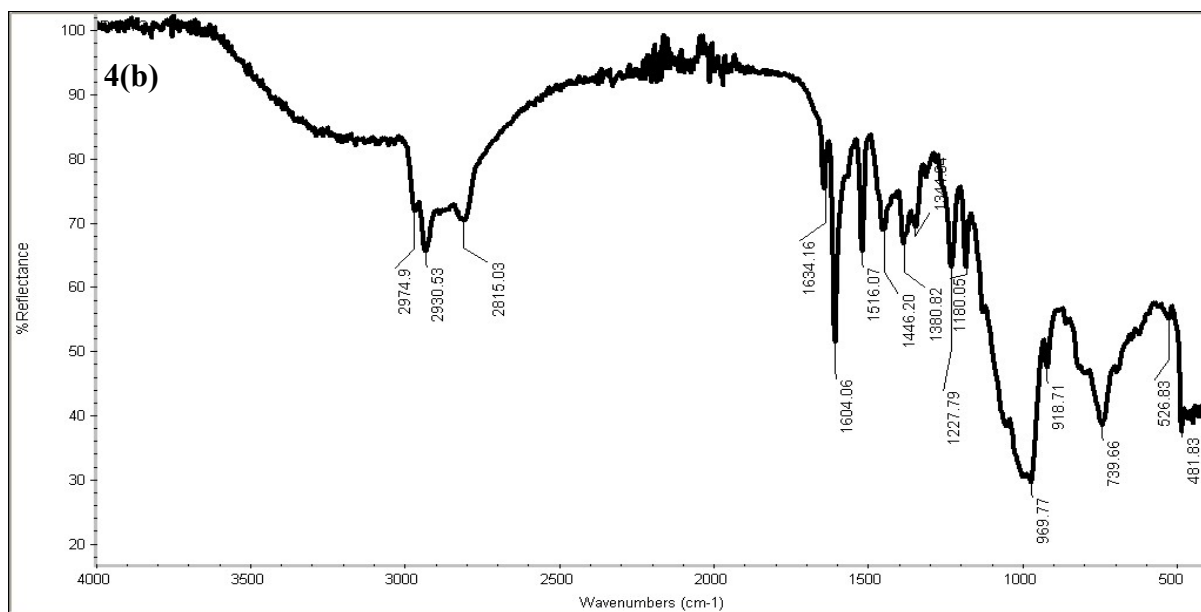

Fig.S11 IR spectrum of compound 4b

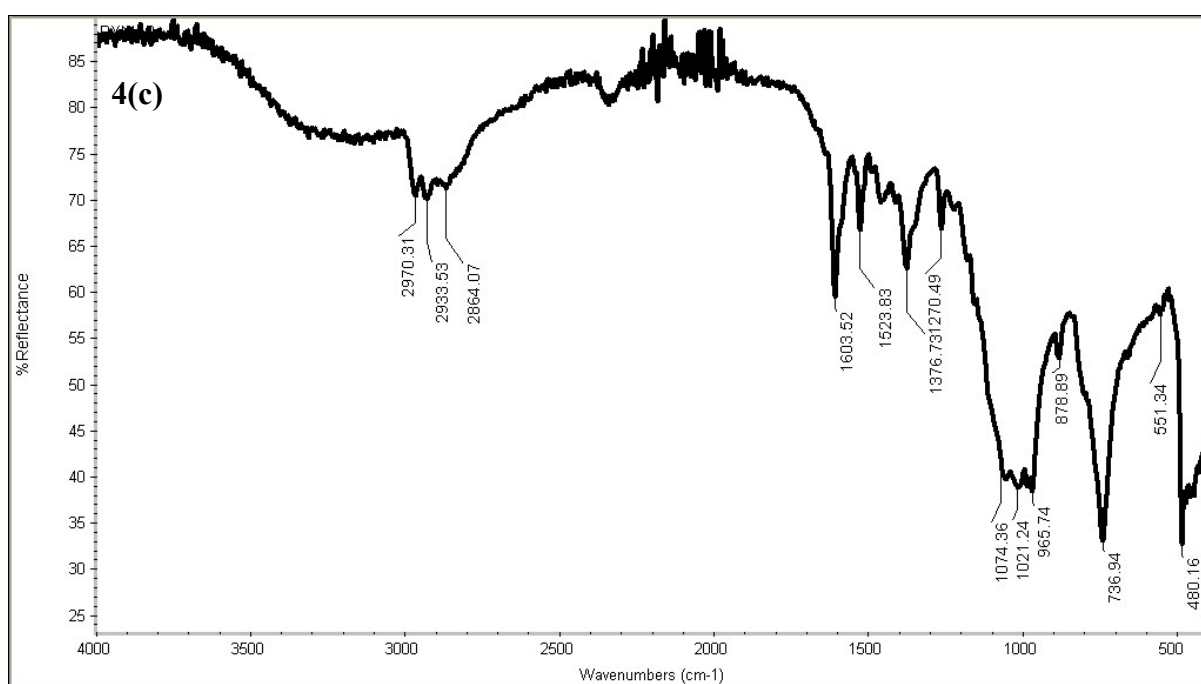

Fig.S12 IR spectrum of compound 4c
